# Supplementary material for: Chiral N,N′-dioxide ligands: synthesis, coordination chemistry and asymmetric catalysis
Source: Royal Society of Chemistry journal article supplement (doi:10.1039/c3qo00059a), 2014-01-01

# Chiral *N,N'*-Dioxide Ligands: Synthesis, Coordination Chemistry and Asymmetric Catalysis

Xiaohua Liu,<sup>a</sup> Lili Lin<sup>a</sup> and Xiaoming Feng<sup>a †</sup>

*Key Laboratory of Green Chemistry & Technology, Ministry of Education, College of  
Chemistry, Sichuan University, Chengdu 610064, P. R. China*

[xmfeng@scu.edu.cn](mailto:xmfeng@scu.edu.cn)

## Supporting Information

1. List of the structures of *N,N'*-dioxides mentioned in the text .....S2
2. Typical procedure for *N,N'*-dioxide preparation.....S2
3. X-ray structures of *N,N'*-dioxide-metal complexes.....S5
4. Full scheme for the depiction of the asymmetric reactions mentioned in  
the text.....S6

## 1. List of the structures of *N,N'*-dioxides mentioned in the text

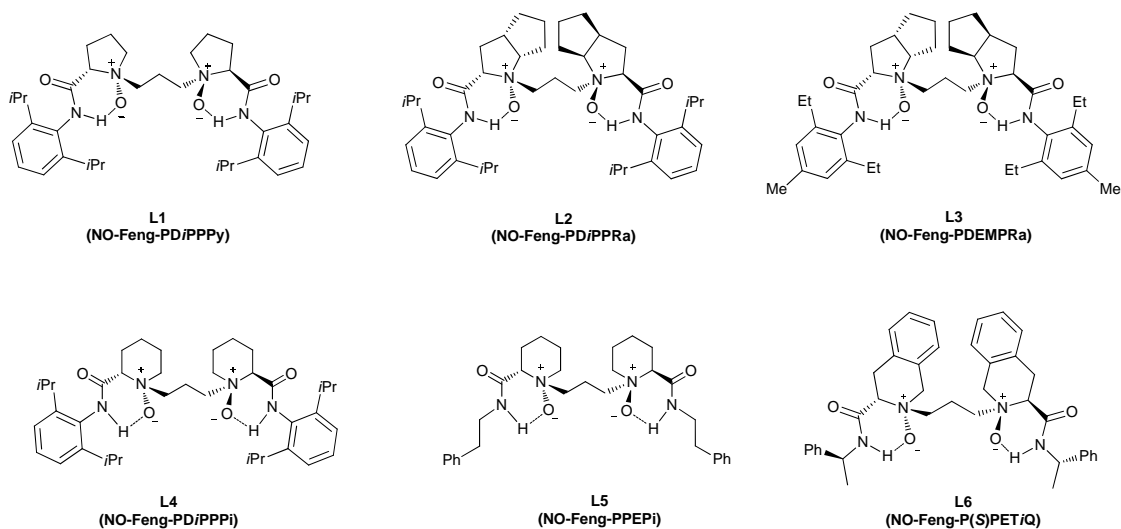

## 2. Typical procedure for *N,N'*-dioxide preparation

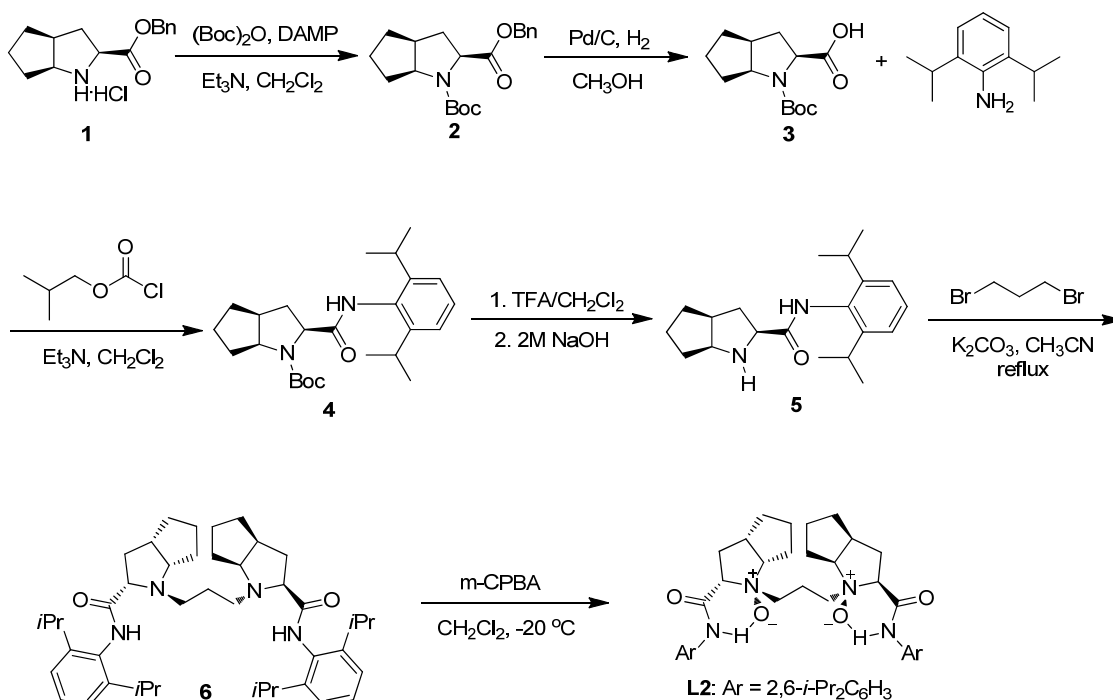

To a solution of (2*S*,3*aS*,6*aS*)-2-azabicyclo[3,3,0]octane-3-carboxylic acid benzyl ester **1** (4.22 g, 15.0 mmol) in CH<sub>2</sub>Cl<sub>2</sub> (25 mL) was added DMAP (1.5 mmol), Et<sub>3</sub>N (32.5 mmol) at 0 °C. After stirring for 20 min, (Boc)<sub>2</sub>O (16.5 mmol) was added. The reaction was stirred at 30 °C and detected by TLC until the reaction was finished (<12 h). The mixture was then washed with 1 M KHSO<sub>4</sub> solution, saturated NaHCO<sub>3</sub> solution, brine, dried over anhydrous Na<sub>2</sub>SO<sub>4</sub>, concentrated, and directly used for the next step (100% yield).

To a solution of **2** (15.0 mmol) in CH<sub>3</sub>OH (15 mL), 10% Pd/C was added. The mixture was stirred under the H<sub>2</sub> atmosphere (6 Mpa) at 30 °C until the reaction was finished (<6 h). Then, Pd/C was removed by filtration and washed with CH<sub>2</sub>Cl<sub>2</sub>. The filtrate was concentrated and directly used for the next step (100% yield).

To a solution of (*S*)-*N*-Boc-ramipril acid **3** (3.83 g, 15 mmol) in THF (35 mL) was added Et<sub>3</sub>N (18 mmol), isobutyl carbonochloridate (18 mmol) at 0 °C under stirring. After 30 min, 2,6-diisopropylaniline (18.0 mmol) was added. The reaction was stirred at 40 °C and detected by TLC. After 36 h, the mixture was concentrated, added with CH<sub>2</sub>Cl<sub>2</sub> (100 mL), washed with 1 N KHSO<sub>4</sub> solution, saturated NaHCO<sub>3</sub> solution, brine, dried over anhydrous Na<sub>2</sub>SO<sub>4</sub>, concentrated and purified through flash chromatograph (EtOAc:petroleum ether = 1:10) to give the white solid **4** (5.0 g, 80% yield).

TFA (10 mL) was added to the solution of the amide **4** in CH<sub>2</sub>Cl<sub>2</sub> (20 mL) and stirred at 30 °C until reaction was finished (1 h). Then, the solvent was evaporated, and CH<sub>2</sub>Cl<sub>2</sub> (50 mL) was added. The pH value of the mixture was brought into the range of 10-12 by the addition of 2 M NaOH solution. The aqueous phase was extracted with CH<sub>2</sub>Cl<sub>2</sub> (3 × 50 mL). The combined organic phase was washed with brine, dried over anhydrous MgSO<sub>4</sub>

and evaporated in vacuo. The residue **5** was directly used for the next step (3.77 g, 100% yield).

K<sub>2</sub>CO<sub>3</sub> (4.98 g, 36 mmol) and 1,3-dibromopropane (7.0 mmol) was added to a solution of (*S*)-*N*-(2,6-diisopropylphenyl)-ramipril-2-carboxamide **5** (12.0 mmol) in CH<sub>3</sub>CN (15 mL) under stirring. It was refluxed and monitored by TLC (24 h). Then, CH<sub>2</sub>Cl<sub>2</sub> (20 mL) was added, the solid was removed by filtration and washed by CH<sub>2</sub>Cl<sub>2</sub>. The filtrate was concentrated and purified by silica gel column chromatography (EtOAc:petroleum ether = 1:2 to 1:1) to give the desired product **6** (3.13 g, 78% yield).

Finally, **6** was oxidated by *m*-CPBA (11.7 mmol, 2.5 eq.) in CH<sub>2</sub>Cl<sub>2</sub> (30 mL) at -20 °C for 1 h and purified through aluminum oxide (alkalinescence) chromatograph (EtOAc : petroleum ether = 1 : 1 to EtOAc) to provide the *N,N'*-dioxide ligand **L2** (2.95 g, 90% yield).

### **3. X-ray structures of *N,N'*-dioxide-metal complexes**

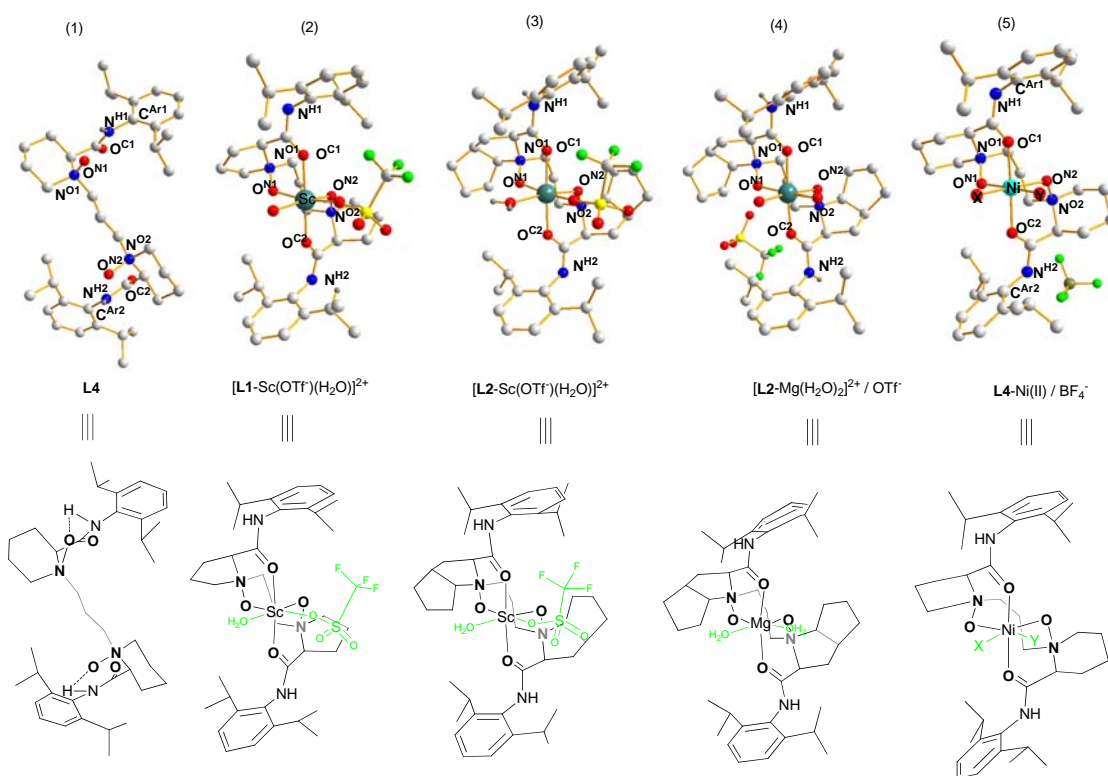

Figure 2. Molecular structures of the ligand **L4** (1),  $[\mathbf{L1}\text{-Sc}(\text{OTf})(\text{H}_2\text{O})]^{2+}$  (2),  $[\mathbf{L2}\text{-Sc}(\text{OTf})(\text{H}_2\text{O})]^{2+}$  (3), and  $[\mathbf{L2}\text{-Mg}(\text{H}_2\text{O})_2]^{2+}$  (4),  $\mathbf{L4}\text{-Ni}(\text{II})[\text{tetrahydrofuran-2-yl)methanol}](\text{BF}_4)_2$  (5). (H atoms, the ancillary bidentate ligand and counter-ion are omitted for clarity)

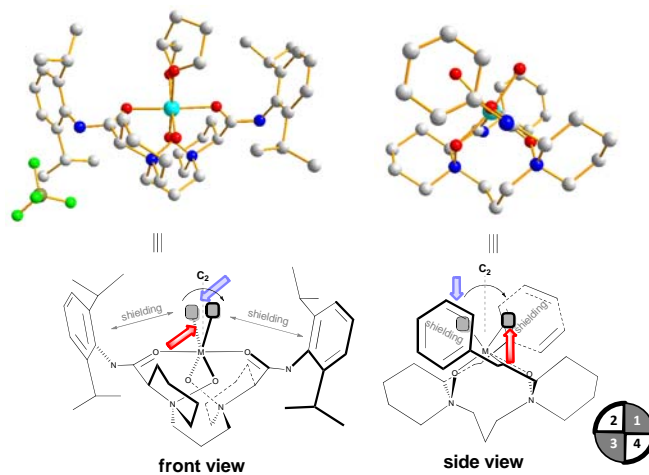

Figure 2. Molecular models of **L4**-metal complex (The isopropyl substituents of amides are omitted in the side view for clarity)

## 4. Full scheme for the depiction of the asymmetric reactions mentioned in the text

### (1) L1/Y(OTf)<sub>3</sub>

#### homologation of $\alpha$ -ketoesters and $\alpha$ -diazoesters

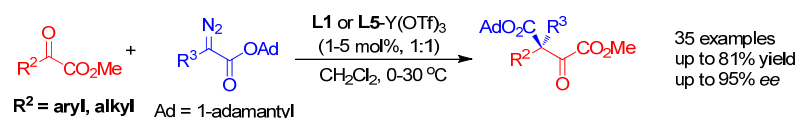

### (2) L2/Sc(OTf)<sub>3</sub>

#### Roskamp–Feng reaction

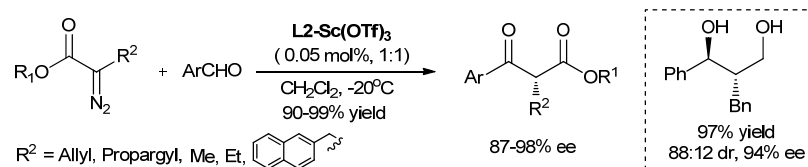

#### electrophilic addition of $\alpha$ -diazoesters to ketones

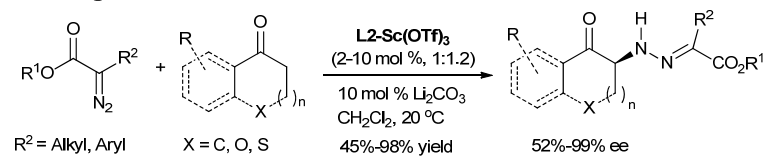

#### ring expansion of isatins with $\alpha$ -diazoesters

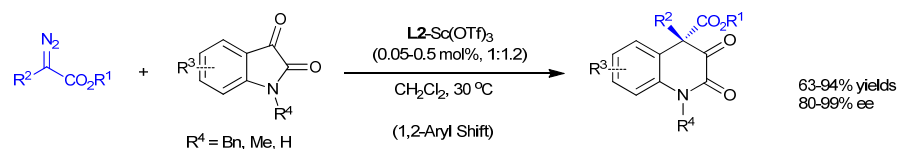

#### Baeyer–Villiger oxidation

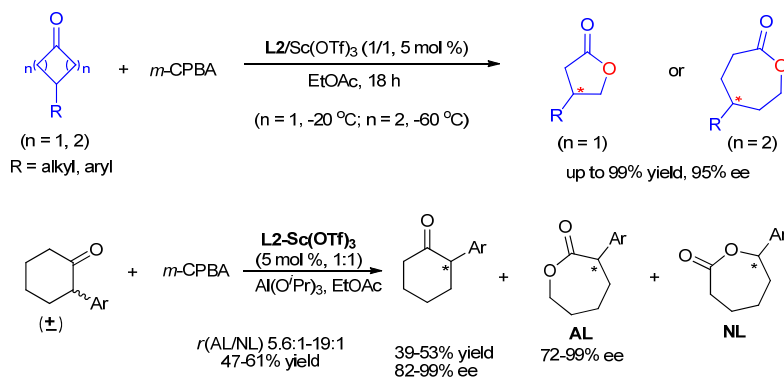

### inverse electron-demand aza-Diels–Alder reaction

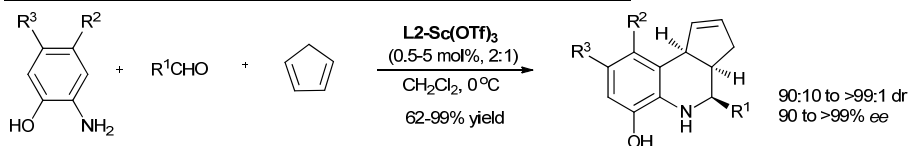

### reduction reaction

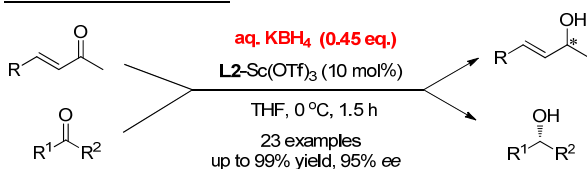

### (3) **L2/Ni(BF<sub>4</sub>)<sub>2</sub>**

#### [8+2] cycloaddition

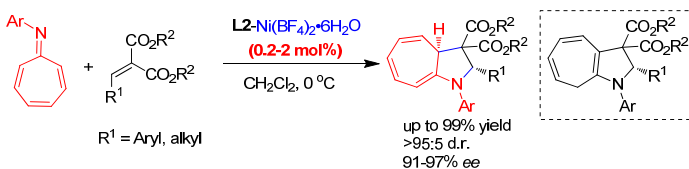

### (4) **L3/Mg(ClO<sub>4</sub>)<sub>2</sub>**

#### 1,3-dipolar cycloaddition of nitrile imines

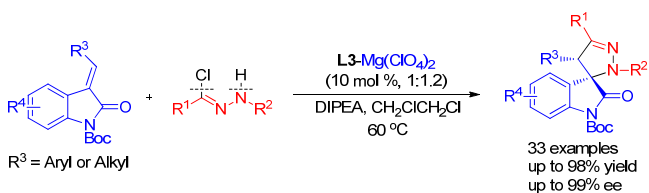

### (5) **L4/In(OTf)<sub>3</sub>**

#### Hetero-Diels–Alder reaction

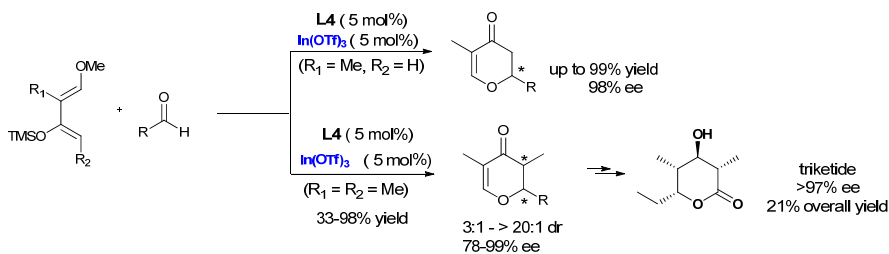

### (6) **L4/Sc(OTf)<sub>3</sub>**

### $\alpha$ -functionalization of 3-substituted oxindoles

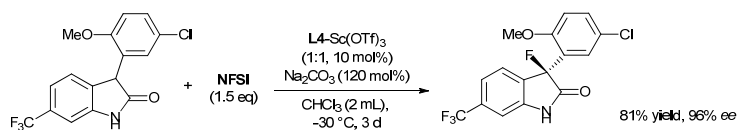

### epoxidation of enones with H<sub>2</sub>O<sub>2</sub>

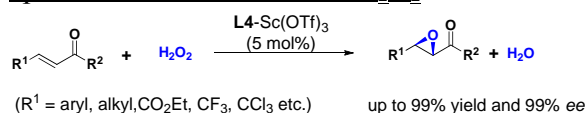

### **(7) L4/Ni(ClO<sub>4</sub>)<sub>2</sub>**

#### Ene reaction

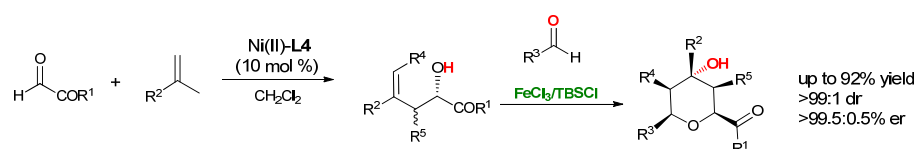

### **(8) L5/Sc(OTf)<sub>3</sub>**

#### Bromoamination and iodoamination reaction

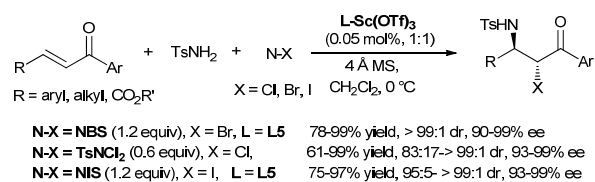

### **(9) L6/Sc(OTf)<sub>3</sub>**

#### $\alpha$ -Arylation of 3-substituted oxindoles

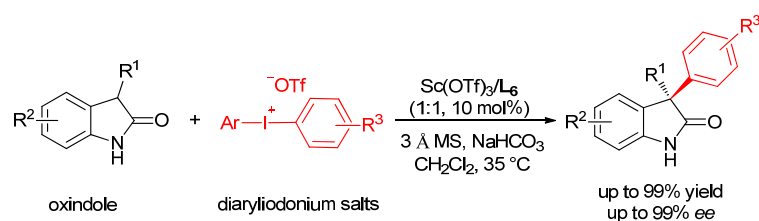

Supplement: c3qo00059a.pdf [file c3qo00059a.pdf]
